# Supplementary material for: Influence of the solvent on the aggregation of a poly(3-hexylthiophene)–quinquethiophene-S,S-dioxide blend at surfaces: an SFM study
Source: Royal Society of Chemistry journal article supplement (doi:10.1039/b418109c), 2005-01-01
Supplement: b418109c.pdf [file b418109c.pdf]

## SUPPORTING INFORMATION

### Influence of the solvent on the aggregation of a poly(3-hexylthiophene) - quinquethiophene-S,S-dioxide blend at surfaces: an SFM study

Giovanni Ridolfi, Laura Favaretto, Giovanna Barbarella,  
Paolo Samorì, Nadia Camaioni

The arrows in Fig. 1SI show the P3HT bands at 545 and 592 nm both in the P3HT film (solid line and solid arrows) and in the film of P3HT:T5OHM 1:1 (w/w) blend deposited from toluene (dashed line and dashed arrows).

The dark characteristics of P3HT:T5OHM 1:1 (w/w) devices spun from chloroform (squares), toluene (circles) and chlorobenzene (triangles) are displayed in Fig 2SI. The I-V characteristics revealed that only the film spun from chloroform exhibits a diode-like behaviour, which makes it suitable for photovoltaic applications.

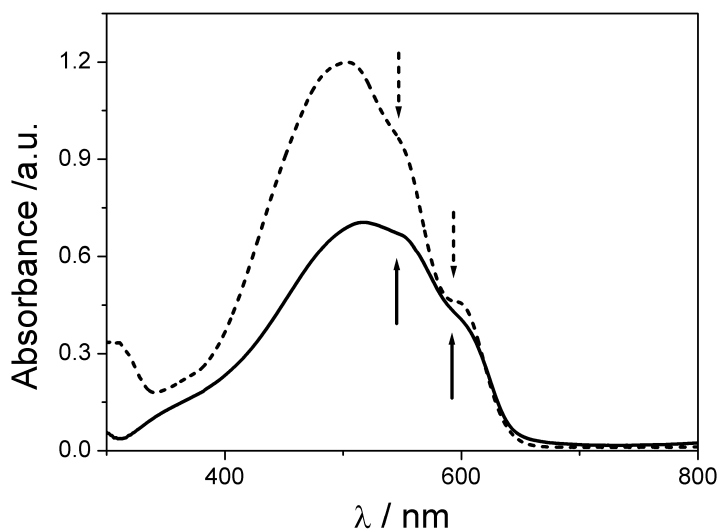

**Figure 1SI:** Absorption spectra of films of P3HT:T5OHM 1:1 (w/w) deposited from toluene (dotted line) and neat P3HT (solid line).

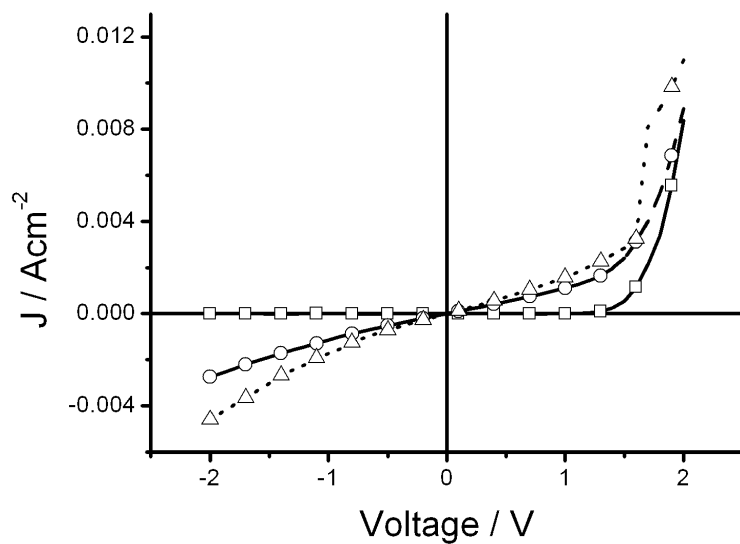

**Figure 2SI:** Dark current-voltage characteristics of P3HT:T5OHM 1:1 (w/w) photodiodes spun from chloroform (squares), toluene (circles) and chlorobenzene (triangles).
